# Supplementary material for: Improving the cultivated rice Sakha104 (Oryza sativa L.) using gene pools of some relative wild species
Source: PeerJ. 2025 May 23;13:e19453. doi: 10.7717/peerj.19453 (PMC12105619; doi:10.7717/peerj.19453)
Supplement: Supplemental Information 1 [file peerj-13-19453-s001.xlsx]

## Sheet: Y1
No.	Name	5-	PnW(g)			4-	PnL(cm)			8-	GYP			6-	GNP			7-	1000GW			2-	PH			1-	HD			3-	TiLL				9- F%				10- Blast
		R1	R2	R3	Mean	R1	R2	R3	Mean	R1	R2	R3	Mean	R1	R2	R3	Mean	R1	R2	R3	Mean	R1	R2	R3	Mean	R1	R2	R3	Mean	R1	R2	R3	Mean	R1	R2	R3	Mean	R1	R2	R3	Mean
1	EPL. 2022- 3	4.6	4.63	4.76	4.66333	20.9	21.3	20.8	21	53.45	52.35	51.45	52.4167	155	156	166	159	29.9	30	31	30.3	116	111	113	113.333	97	96	99	97.3333	28	24	26	26	90.15	89.94	93.12	91.07	1	1	1	1
2	EPL. 2022- 4	4.26	4.11	4.7	4.35667	21.25	21.85	21.3	21.4667	62.04	60.77	62.65	61.82	171	180	171	174	29.6	29.5	30	29.7	102	100	102	101.333	101	103	100	101.333	33	30	29	30.6667	82.88	80.56	83.78	82.4067	1	1	1	1
3	EPL. 2022- 13	3.7	3.92	3.78	3.8	22	22.3	22.8	22.3667	51.92	54.25	54	53.39	117	115	121	117.667	30	29.7	28.6	29.4333	99	88	99	95.3333	93	95	95	94.3333	22	21	21	21.3333	96.72	95.65	94.72	95.6967	1	1	1	1
4	EPL. 2022- 42	3.88	3.9	3.66	3.81333	21.75	22	21.6	21.7833	56.32	56.56	58.33	57.07	166	155	160	160.333	24.3	24.6	23.8	24.2333	120	121	122	121	99	98	100	99	18	28	22	22.6667	83.85	84.25	86.88	84.9933	1	1	1	1
5	EPL. 2022- 43	3.87	4.1	4.4	4.12333	25.5	24.2	25.2	24.9667	65.14	62.34	65.88	64.4533	224	193	205	207.333	21.64	21.5	22.4	21.8467	120	118	123	120.333	100	100	99	99.6667	29	25	26	26.6667	88.9	91.34	85.98	88.74	1	1	1	1
6	EPL. 2022- 49	4.1	4.98	5.03	4.70333	20	20.6	20.4	20.3333	46.11	51	50.24	49.1167	192	207	200	199.667	24.54	24.13	24.6	24.4233	90	95	89	91.3333	96	97	93	95.3333	23	17	27	22.3333	96.37	96.17	94.41	95.65	1	1	1	1
7	EPL. 2022- 52	4.95	5	4.9	4.95	22.4	21.8	21.9	22.0333	62.5	60.3	67.55	63.45	266	240	271	259	25.2	24.3	26.7	25.4	106	108	110	108	101	100	99	100	25	34	25	28	93.98	97.8	94.78	95.52	1	1	1	1
8	EPL. 2022- 53	5.28	4.93	4.78	4.99667	22.4	22.4	21.8	22.2	64.07	60.11	67.25	63.81	175	165	180	173.333	27.3	28.7	28.2	28.0667	110	109	113	110.667	102	103	101	102	22	25	30	25.6667	90.75	94.79	90.58	92.04	1	1	1	1
9	EPL. 2022- 17	4.1	4.7	4.85	4.55	20.8	22.4	22.1	21.7667	52.71	55.12	51.47	53.1	168	209	187	188	25	22	24.3	23.7667	102	99	101	100.667	98	95	99	97.3333	27	20	19	22	90	92	86.42	89.4733	1	1	1	1
10	EPL. 2022- 21	4.34	4.35	4.22	4.30333	23.1	23	23.5	23.2	56.31	55.79	58.34	56.8133	158	167	166	163.667	23.93	23.73	24	23.8867	104	108	108	106.667	100	99	100	99.6667	18	18	16	17.3333	88	84.76	86.11	86.29	1	1	1	1
11	EPL. 2022- 31	4.65	4.55	3.9	4.36667	24.6	25	24.1	24.5667	53.89	55	57.88	55.59	153	150	145	149.333	30.8	30.6	31	30.8	106	104	102	104	97	95	95	95.6667	28	20	27	25	96.96	95.42	96.13	96.17	1	1	1	1
12	EPL. 2022- 59	5.46	4.9	5.48	5.28	22	24	23.5	23.1667	69.61	66.25	70.33	68.73	143	153	159	151.667	29.03	27.72	29.24	28.6633	124	128	120	124	98	100	97	98.3333	21	26	27	24.6667	95.1	94.48	94.94	94.84	1	1	1	1
13	EPL. 2022- 61	4.85	5.44	5.4	5.23	21.5	23.2	24	22.9	54	49.37	55.12	52.83	208	194	217	206.333	26	24.38	25	25.1267	111	117	113	113.667	99	96	98	97.6667	17	21	18	18.6667	96.6	96.31	93.54	95.4833	1	1	1	1
14	EPL. 2022- 62	4.78	4.37	4.89	4.68	23.75	22.5	22.75	23	51.76	54.87	48.36	51.6633	158	154	158	156.667	25.26	25	30	26.7533	120	124	125	123	98	96	99	97.6667	30	33	32	31.6667	94.93	98.1	94.03	95.6867	1	1	1	1
15	EPL. 2022- 64	5.2	5.55	5.13	5.29333	22.9	23.25	22.5	22.8833	61.24	56.38	63.28	60.3	184	201	189	191.333	30.1	30.3	31.2	30.5333	110	109	100	106.333	102	104	101	102.333	26	28	24	26	91.73	92.3	94.75	92.9267	1	1	1	1
16	EPL. 2022- 65	4.42	4.22	4.48	4.37333	22	21.6	21.3	21.6333	63.97	63	60.8	62.59	183	167	160	170	28.95	29.24	29.1	29.0967	93	95	100	96	99	96	97	97.3333	23	21	23	22.3333	92.34	93.29	93.33	92.9867	1	1	1	1
17	EPL. 2022- 67	5.41	5.3	5.4	5.37	21.8	22.75	23	22.5167	60	60.3	62	60.7667	171	187	173	177	27.85	26.02	26.8	26.89	124	125	125	124.667	105	103	103	103.667	35	27	34	32	88.82	91.16	89.1	89.6933	1	1	1	1
18	EPL. 2022- 68	4.86	5.1	5	4.98667	21.55	23.4	22.5	22.4833	61.74	66.12	65.55	64.47	160	166	169	165	25.3	26.6	25.8	25.9	105	100	105	103.333	105	101	102	102.667	30	26	29	28.3333	85.54	85	85.9	85.48	1	1	1	1
19	EPL. 2022- 73	5.2	4.86	5.4	5.15333	21.6	21.2	21.1	21.3	62.01	60.91	60.31	61.0767	193	179	185	185.667	26.91	28.75	27	27.5533	100	106	110	105.333	100	98	97	98.3333	28	27	30	28.3333	96.01	91.7	91.62	93.11	1	1	1	1
20	EPL. 2022- 74	4.7	4.64	4.2	4.51333	21.4	21.75	21.3	21.4833	64.4	62.77	65	64.0567	178	147	179	168	24.75	25.08	24.65	24.8267	115	116	115	115.333	102	103	101	102	20	25	28	24.3333	93.47	92.18	96.24	93.9633	1	1	1	1
21	Sakha 104(Parent)	3.86	3.7	4.1	3.88667	21	22	20.5	21.1667	46.63	45.5	45.76	45.9633	127	137	135	133	28.2	28.4	28.5	28.3667	119	117	118	118	105	106	106	105.667	18	19	14	17	94.48	95.55	95.41	95.1467	3	4	5	4
										58.6595	58.178	59.7895	58.8757									108.85	109.05	109.75	109.217	99.6	98.9	98.75	99.0833	25.15	24.8	25.65	25.2

## Sheet: means
Genotypes	HD		PH		Till		PnL			Genotypes	PnW		GNP		1000GW		GYP			Genotypes	F%		Blast		Hull.%		Mill %			Genotypes	H. R. %		Amyl. %		GT		Elong.
Season	2021	2022	2021	2022	2021	2022	2021	2022		Season	2021	2022	2021	2022	2021	2022	2021	2022		Season	2021	2022	2021	2022	2021	2022	2021	2022		Season	2021	2022	2021	2022	2021	2022	2021	2022
L1	97.3333	96	113.333	112.667	26	25.3333	21	21.3333		L1	4.66333	4.16667	159	161.667	30.3	30.4467	52.4167	51.6		L1	91.07	90.4067	1	1	80.5733	79.8578	71.7833	70.9811		L1	50.4333	51.1444	28.9993	28.5329	4	3.89667	38.2687	37.7562
L2	101.333	100.333	101.333	102	30.6667	30.3333	21.4667	21.4667		L2	4.35667	4.20333	174	178	29.7	29.7667	61.82	61.4733		L2	82.4067	81.7733	1	1	76.2222	76.0741	67.1989	67.5296		L2	56.3022	56.6007	19.238	18.8254	5.66667	5.44444	46.7097	45.2366
L3	94.3333	92	95.3333	98	21.3333	20.6667	22.3667	22.4333		L3	3.8	3.46667	117.667	122.667	29.4333	29.4333	53.39	52.9167		L3	95.6967	95.3433	1	1	80.6667	79.7789	72.0444	71.4748		L3	60.45	61.15	22.6941	22.7961	2.33333	2.77556	23.7836	23.9279
L4	99	99.3333	121	118.167	22.6667	22.3333	21.7833	21.9167		L4	3.81333	3.39333	160.333	164	24.2333	24.3	57.07	57.2967		L4	84.9933	85.3767	1	1	80.9067	80.3822	69.6667	69.7722		L4	42	42.6667	24.3092	24.2061	2	2.33333	28.1049	27.3683
L5	99.6667	99.6667	120.333	119.667	26.6667	26.6667	24.9667	24.9667		L5	4.12333	4.16667	207.333	207.333	21.8467	21.7467	64.4533	62.6267		L5	88.74	88.78	1	1	82.7444	82.7981	70.55	70.5167		L5	40.4167	41.1389	25.5942	25.3961	2.66667	2.67778	19.1649	19.7216
L6	95.3333	94.3333	91.3333	89.6667	22.3333	22.6667	20.3333	21.0667		L6	4.70333	4.5	199.667	198	24.4233	24.4233	49.1167	47.4967		L6	95.65	95.5267	1	1	82.7378	82.2059	73.5611	73.597		L6	55.6722	55.8907	20.4018	20.9346	3.66667	3.74444	30.9677	30.3226
L7	100	100.333	108	107	28	26.6667	22.0333	22.1		L7	4.95	5.11667	259	259.333	25.4	25.4667	73.45	74.25		L7	95.52	95.5267	1	1	79.8967	79.4822	73.5578	73.2693		L7	50.7133	51.0711	25.9885	25.619	6.33333	6.05556	29.5687	29.5229
L8	102	100	110.667	109.167	25.6667	29.6667	22.2	22.1		L8	4.99667	5.07	173.333	176.667	28.0667	28.2	73.81	73.1733		L8	92.04	91.4433	1	1	79.95	79.7767	73.3544	73.4515		L8	50.5233	50.7744	21.6015	21.0676	7	6.66667	47.1895	45.7298
L9	97.3333	94.6667	100.667	100.667	22	21.3333	21.7667	21.8		L9	4.55	4.68333	188	193	23.7667	24.2333	53.1	52.7267		L9	89.4733	88.8567	1	1	80.4833	79.8278	70.6633	70.6278		L9	41.3367	41.4456	27.3315	27.1076	5.66667	5.44444	18.0116	18.6705
L10	99.6667	99.6667	106.667	104.667	17.3333	17.6667	23.2	23.1333		L10	4.30333	4.18667	163.667	164.667	23.8867	23.8867	56.8133	56		L10	86.29	86.25	1	1	80.5233	80.6878	73.4078	73.6959		L10	49.7533	50.5844	23.7293	23.8195	6	5.66667	16.6369	18.2123
L11	95.6667	94	104	104.333	25	24.6667	24.5667	24.6667		L11	4.36667	4.4	149.333	154.667	30.8	30.9333	55.59	54.0433		L11	96.17	95.8067	1	1	82.9278	82.9793	74.0078	73.9593		L11	69.9967	69.6656	22.2944	21.8629	6	5.83333	48.7863	46.5954
L12	98.3333	97.6667	124	120.667	24.6667	24.3333	23.1667	23.5		L12	5.28	5.02667	151.667	156	28.6633	29.09	74.73	71.7667		L12	94.84	94.7667	1	1	83.0044	82.4448	70	70		L12	60.0033	59.2944	22.1784	21.9856	6	5.83333	38.5487	37.8496
L13	97.6667	96	113.667	113.333	18.6667	19	22.9	23.0667		L13	5.23	4.91667	206.333	205.333	25.1267	25.3333	52.83	51.6067		L13	95.4833	95.25	1	1	80.6	80.5333	70.6667	70.5556		L13	52.3744	53.4581	22.1073	21.7382	2.66667	2.77778	24.3188	24.7729
L14	97.6667	98	123	122.667	31.6667	31	23	22.9833		L14	4.68	4.45667	156.667	161.667	26.7533	25.7533	51.6633	59.0733		L14	95.6867	95.51	1	1	80	79.6667	70.1833	70.4978		L14	51.3067	52.1022	21.3089	20.8726	4.66667	4.77778	21.5382	22.5127
L15	102.333	99.6667	106.333	106.333	26	25.3333	22.8833	22.9167		L15	5.29333	5.08333	191.333	191	30.5333	30.8	60.3	59.3133		L15	92.9267	92.7667	1	1	82.5544	81.8848	72.8444	72.6148		L15	62.2111	62.847	21.6092	21.7395	7	6.76667	38.9045	38.6348
L16	97.3333	96.6667	96	95	22.3333	22.6667	21.6333	21.8667		L16	4.37333	4.43333	170	171.333	29.0967	29.3967	62.59	61.59		L16	92.9867	93.2067	1	1	80	80.02	73.2778	73.2026		L16	63.4711	63.377	23.3848	23.5899	4.66667	4.77778	43.9057	42.6352
L17	103.667	102	124.667	123	32	31.6667	22.5167	22.5167		L17	5.37	5.49333	177	180.333	26.89	26.56	70.7667	74.6		L17	89.6933	90.0867	1	1	79.8467	79.2389	70.4133	70.5044		L17	50.5	50.5	24.3493	24.2329	6.33333	6.22222	35.626	34.8753
L18	102.667	101.667	103.333	103	28.3333	27.3333	22.4833	22.65		L18	4.98667	5.14	165	166	25.9	26.1667	74.47	73.04		L18	85.48	85.3	1	1	83.4578	82.8193	72.9444	72.9015		L18	64.1111	64.2237	23.1365	23.0243	7.66667	7.44444	21.9587	21.9862
L19	98.3333	98	105.333	103.667	28.3333	28.3333	21.3	21.6		L19	5.15333	4.82	185.667	185	27.5533	27.5533	71.0767	70.4067		L19	93.11	92.2067	1	1	80.2933	81.0978	70.2767	70.6456		L19	55.8522	55.3174	25.8339	25.4226	2.33333	2.88889	18.3597	19.7866
L20	102	100.667	115.333	114.667	24.3333	24	21.4833	21.05		L20	4.51333	4.86667	168	168.333	24.8267	25.1433	74.0567	71.2567		L20	93.9633	93.62	1	1	80.5167	80.6722	73.2278	73.5759		L20	56.4376	57.1459	23.4305	23.1537	6.66667	6.11111	19.0858	20.3619
Sakha104	105.667	105	118	118	17	17.6667	21.1667	21		Sakha104	3.88667	3.92	133	133.667	28.3667	28.5333	45.9633	45.0567		Sakha104	95.1467	94.8333	4	4.33	81.75	81.3333	71.9367	70.9333		Sakha104	61.6	59.5	17.8333	18.0667	5.5	6	43	42.5
LSD 5%										LSD 5%										LSD 5%										LSD
	99.3968	98.3651	109.635	108.873	24.8095	24.7302	22.296	22.3873	#DIV/0!	#DIV/0!	4.63778	4.5481	174.095	176.127	26.9317	27.0079	61.4037	61.0149	#DIV/0!	#DIV/0!	91.7794	91.5541	1.14286	1.15857	80.936	80.6458	71.6937	71.6337	#DIV/0!	#DIV/0!	54.546	54.7571	23.2073	23.0473	4.99206	4.95899	31.0685	30.9038

## Sheet: genetic advance
SOV	df	Year	HD	PH	TILL	PNL	Blast	GNP	PNW	GYP	1000GW	F. %	Hulling	Milling	Head rice	Amylose cont.	GT	Elongation
Genotypes	20	2021	25.7873	296.263	55.02	3.804	1.285	2639.37	0.932	271.1	20.171	51.86	7.92899	9.36665	179.063	20.7562	9.60476	341.409
		2022	29.1302	268.058	52.0206	3.57991	1.5873	2436.62	0.738	276.92	20.92	51.4213	7.67172	8.87696	168.615	14.5013	7.20956	300.473
Rep.	2	2021	3.44444	4.11111	1.71	0.822	0.0476	66.4762	0.159	8.579	1.649	1.437	0.863757	0.658787	1.06989	0.871944	0.047619	2.07772
		2022	1.01587	2.55159	4.77778	0.167778	0.015873	64.5873	0.048	9.761	1.06241	3.04372	1.10392	0.121687	0.436049	4.91068	0.238254	0.504802
Error	40	2021	1.86111	9.62778	10.8	0.336	0.047	103.026	0.082	4.192	0.817	3.037	0.407384	0.912329	1.04091	0.333269	0.230952	4.38175
		2022	0.999206	5.95575	5.91111	0.359153	0.015873	61.0873	0.07	4.605	0.339066	1.75554	0.785461	0.209594	2.02925	0.825866	0.224884	1.61755
	X ̅	2021	99.4	109.63	25.2	22.3525	1	174.1	4.64	61.4	26.86	91.611	80.94	71.69	54.55	23.21	4.99	31.07
	X ̅	2022	98.37	108.87	25.0833	22.4567	1	176.13	4.55	61.01	26.9317	91.3902	80.65	71.63	54.76	23.05	4.96	30.9
GV		2021	7.9754	95.5451	14.74	1.156	0.412667	845.448	0.283333	88.9693	6.45133	16.2743	2.5072	2.81811	59.3407	6.80764	3.1246	112.342
		2022	9.377	87.3674	15.3698	1.07359	0.523809	791.844	0.222667	90.7717	6.86031	16.5553	2.29542	2.88912	55.5286	4.55848	2.32823	99.6185
PV		2021	9.83651	105.173	25.54	1.492	0.459667	948.474	0.365333	93.1613	7.26833	19.3113	2.91459	3.73044	60.3816	7.14091	3.35555	116.724
		2022	10.3762	93.3232	21.2809	1.43274	0.539682	852.932	0.292667	95.3767	7.19938	18.3108	3.08088	3.09872	57.5578	5.38434	2.55311	101.236
SQRT GV		2021	2.82407	9.77472	3.83927	1.07517	0.642391	29.0766	0.532291	9.43236	2.53995	4.03415	1.58341	1.67872	7.70329	2.60915	1.76765	10.5992
		2022	3.06219	9.34705	3.92044	1.03614	0.723747	28.1397	0.471876	9.52742	2.61922	4.06881	1.51506	1.69974	7.45175	2.13506	1.52585	9.98091
GCV		2021	2.84112	8.9161	15.2352	4.81009	64.2391	16.7011	11.4718	15.3621	9.45625	4.40356	1.95628	2.34164	14.1215	11.2415	35.4239	34.1138
		2022	3.11293	8.58552	15.6297	4.61395	72.3747	15.9767	10.3709	15.6162	9.72543	4.45214	1.87857	2.37295	13.608	9.26273	30.7632	32.3007
SQRT PV		2021	3.13632	10.2554	5.05371	1.22147	0.677987	30.7973	0.604428	9.65201	2.69598	4.39447	1.70722	1.93143	7.77056	2.67225	1.83182	10.8039
		2022	3.22121	9.66039	4.61313	1.19697	0.734631	29.205	0.540987	9.7661	2.68317	4.27911	1.75524	1.76032	7.58669	2.32042	1.59785	10.0616
PCV		2021	3.15525	9.35454	20.0544	5.4646	67.7987	17.6894	13.0265	15.7199	10.0372	4.79688	2.10924	2.69415	14.2448	11.5134	36.7098	34.7728
		2022	3.27459	8.87333	18.3912	5.33013	73.4631	16.5815	11.8898	16.0074	9.96286	4.68224	2.17637	2.45751	13.8544	10.0669	32.2146	32.5619
h2b		2021	0.810796	0.908458	0.577134	0.774799	0.897752	0.891377	0.775547	0.955003	0.887595	0.842735	0.860226	0.755436	0.982761	0.95333	0.931173	0.962461
		2022	0.903702	0.936181	0.722235	0.749324	0.970588	0.92838	0.76082	0.951718	0.952903	0.904125	0.745053	0.932361	0.964744	0.846617	0.911918	0.984022
GA		2021	1642.93	19682.3	3036.44	238.136	85.0093	174162	0.583667	183.277	1328.97	3352.51	516.484	580.53	12224.2	1402.37	643.668	23142.5
		2022	1931.66	17997.7	3166.18	221.159	107.905	163120	0.458693	186.99	1413.22	3410.38	472.856	595.159	11438.9	939.046	479.614	20521.4
GA%		2021	1652.85	17953.4	12049.4	1065.37	8500.93	100036	12.579	298.496	4947.78	3659.51	638.107	809.778	22409.1	6042.11	12899.2	74485.2
		2022	1963.67	16531.4	12622.7	984.824	10790.5	92613.4	10.0812	306.49	5247.44	3731.67	586.307	830.88	20889.1	4073.95	9669.65	66412.3

## Sheet: Out put (2)
HD	Sumsqrs	df	Meansqr	F	p		2- PH	Sumsqrs	df	Meansqr	F	p		3- Tiil	Sumsqrs	df	Meansqr	F	p
Genotypes	682.762	20	34.1381	32.0045	1.463e-18		Genotypes	5714.98	20	285.749	43.8864	4.187e-21		Genotypes	1040.41	20	52.0206	8.80048	3.942e-09
Rep	2	2	1	0.9375	0.4		Rep	2.88889	2	1.44444	0.221843	0.802		Rep	9.55556	2	4.77778	0.808271	0.4528
Error	42.6667	40	1.06667				Error	260.444	40	6.51111				Error	236.444	40	5.91111
Total	727.429	62					Total	5978.32	62					Total	1286.41	62
4-PNL	Sumsqrs	df	Meansqr	F	p		5-PNW	Sumsqrs	df	Meansqr	F	p		6-GNP	Sumsqrs	df	Meansqr	F	p
Genotypes	71.5982	20	3.57991	9.96765	6.093e-10		Genotypes	14.8175	20	0.740874	12.2194	2.526e-11		Genotypes	51261.4	20	2563.07	38.5355	4.748e-20
Rep	0.335556	2	0.167778	0.467149	0.6302		Rep	0.202829	2	0.101414	1.67265	0.2006		Rep	75.5238	2	37.7619	0.567747	0.5713
Error	14.3661	40	0.359153				Error	2.42524	40	0.060631				Error	2660.48	40	66.5119
Total	86.2998	62					Total	17.4455	62					Total	53997.4	62
7- 1000GW	Sumsqrs	df	Meansqr	F	p		8- GYP	Sumsqrs	df	Meansqr	F	p		9-F%	Sumsqrs	df	Meansqr	F	p
Genotypes	418.4	20	20.92	61.6988	6.607e-24		Genotypes	7397.57	20	369.878	111.334	7.375e-29		Genotypes	1028.43	20	51.4213	29.2908	7.372e-18
Rep	2.12482	2	1.06241	3.13335	0.05443		Rep	9.59429	2	4.79714	1.44395	0.248		Rep	6.08743	2	3.04372	1.73377	0.1896
Error	13.5626	40	0.339066				Error	132.889	40	3.32223				Error	70.2218	40	1.75554
Total	434.087	62					Total	7540.05	62					Total	1104.73	62
10-Blast	Sumsqrs	df	Meansqr	F	p
Genotypes	31.746	20	1.5873	100	5.965e-28		Amy modi	Sumsqrs	df	Meansqr	F	p		gt modi	Sumsqrs	df	Meansqr	F	p
Rep	0.031746	2	0.015873	1	0.3769		Rows	290.027	20	14.5013	17.5589	6.227e-14		Rows	144.191	20	7.20956	32.059	1.418e-18
Error	0.634921	40	0.015873				Cols	9.82136	2	4.91068	5.94609	0.005485		Cols	0.476508	2	0.238254	1.05945	0.3562
Total	32.4127	62					Error	33.0346	40	0.825866				Error	8.99536	40	0.224884
							Total	332.883	62					Total	153.663	62
							hr modi	Sumsqrs	df	Meansqr	F	p		elong modi	Sumsqrs	df	Meansqr	F	p
							Rows	3372.29	20	168.615	83.0922	2.163e-26		Rows	6009.47	20	300.473	185.758	3.232e-33
							Cols	0.872098	2	0.436049	0.214882	0.8076		Cols	1.0096	2	0.504802	0.312078	0.7337
							Error	81.1698	40	2.02925				Error	64.7021	40	1.61755
							Total	3454.33	62					Total	6075.18	62

## Sheet: Out put (1)
Variate: HD						Variate: PH						Variate: PnL_cm
Source of variation	d.f.	s.s.	m.s.	v.r.	F pr.	Source of variation	d.f.	s.s.	m.s.	v.r.	F pr.	Source of variation	d.f.	s.s.	m.s.	v.r.	F pr.
reps stratum	2	3.5238	1.7619	2.8		reps stratum	2	5.81	2.905	0.31		reps stratum	2	1.6453	0.8227	2.45
reps.*Units* stratum						reps.*Units* stratum						reps.*Units* stratum
No	20	727.333	36.3667	57.86	<.001	No	20	6478.38	323.919	34.14	<.001	No	20	76.0965	3.8048	11.32	<.001
Residual	40	25.1429	0.6286			Residual	40	379.524	9.488			Residual	40	13.4397	0.336
Total	62	756				Total	62	6863.71				Total	62	91.1815
1000 GW						Variate: 10_Blast
Source of variation	d.f.	s.s.	m.s.	v.r.	F pr.	Source of variation	d.f.	s.s.	m.s.	v.r.	F pr.
reps stratum	2	3.2983	1.6492	2.02		reps stratum	2	0.09524	0.04762	1
reps.*Units* stratum						reps.*Units* stratum
No	20	403.427	20.1713	24.67	<.001	No	20	25.7143	1.28571	27	<.001
Residual	40	32.7011	0.8175			Residual	40	1.90476	0.04762
Total	62	439.426				Total	62	27.7143
Variate: %9_F%						Variate: GNP						Variate: GYP
Source of variation	d.f.	s.s.	m.s.	v.r.	F pr.	Source of variation	d.f.	s.s.	m.s.	v.r.	F pr.	Source of variation	d.f.	s.s.	m.s.	v.r.	F pr.
reps stratum	2	2.874	1.437	0.47		reps stratum	2	74.7	37.3	0.36		reps stratum	2	21.375	10.687	2.26
reps.*Units* stratum						reps.*Units* stratum						reps.*Units* stratum
No	20	1037.38	51.869	17.08	<.001	No	20	54115.9	2705.8	25.93	<.001	No	20	7803.02	390.151	82.63	<.001
Residual	40	121.481	3.037			Residual	40	4174	104.3			Residual	40	188.859	4.721
Total	62	1161.74				Total	62	58364.6				Total	62	8013.25
Variate: PnW_g						Variate: TiLL
Source of variation	d.f.	s.s.	m.s.	v.r.	F pr.	Source of variation	d.f.	s.s.	m.s.	v.r.	F pr.
reps stratum	2	0.5424	0.2712	3.41		reps stratum	2	3.43	1.71	0.16
reps.*Units* stratum						reps.*Units* stratum
No	20	12.2259	0.61129	7.69	<.001	No	20	1100.38	55.02	5.1	<.001
Residual	40	3.17853	0.07946			Residual	40	431.9	10.8
Total	62	15.9468				Total	62	1535.71

## Sheet: Anova Table
											LSD 5%						LSD 1%
SOV	df	Year	HD	PH	TILL	PNL	Blast
Genotypes	20	2021	25.7873	296.263	55.02	3.804	1.285		2.32872	2.63106	2.41865	2.11621	2.00443		3.11726	3.52197	3.23764	2.83279	2.68316
		2022	29.1302	268.058	52.0206	3.57991	1.5873		2.34296	2.61793	2.41188	2.1098	2.02572		3.13631	3.5044	3.22858	2.8242	2.71166
Rep.	2	2021	3.44444	4.11111	1.71	0.822	0.0476
		2022	1.01587	2.55159	4.77778	0.167778	0.015873
Error	40	2021	1.86111	9.62778	10.8	0.336	0.047
		2022	0.999206	5.95575	5.91111	0.359153	0.015873
											0.05						0.01
SOV	df	Year	GNP	PNW	GYP	1000GW	F. %
Genotypes	20	2021	2639.37	0.932	271.1	20.171	51.86		2.93509	1.9725	2.61941	2.30029	2.41151		3.92896	2.64042	3.50638	3.0792	3.22808
		2022	2436.62	0.738	276.92	20.92	51.4213		2.92339	1.94962	2.62219	2.30449	2.41048		3.91329	2.60979	3.5101	3.08482	3.22671
Rep.	2	2021	66.4762	0.159	8.579	1.649	1.437
		2022	64.5873	0.048	9.761	1.06241	3.04372
Error	40	2021	103.026	0.082	4.191	0.817	3.037
		2022	61.0873	0.07	4.605	0.339066	1.75554
											0.05						0.01
SOV	df	Year	Hulling	Milling	Head rice	Amylose cont.	GT	Elongation
Genotypes	20	2021	7.92899	9.36665	179.063	20.7562	9.60476	341.409	2.19537	2.21374	2.56565	2.30358	2.21652	2.64978	2.93875	2.96334	3.43441	3.08361	2.96706	3.54704
		2022	7.67172	8.87696	168.615	14.5013	7.20956	300.473	2.19175	2.2078	2.55795	2.26265	2.18495	2.63292	2.93391	2.95539	3.4241	3.02881	2.92481	3.52446
Rep.	2	2021	0.863757	0.658787	1.06989	0.871944	0.047619	2.07772
		2022	1.10392	0.121687	0.436049	4.91068	0.238254	0.504802
Error	40	2021	0.407384	0.912329	1.04091	0.333269	0.230952	4.38175
		2022	0.785461	0.209594	2.02925	0.825866	0.224884	1.61755

## Sheet: Sheet1
					0.05										0.01
	2.36909	2.36161	2.64283	2.62631	2.41865	2.41188	2.11621	2.1098	2.00443	2.02572			3.1713	3.53772	3.23764	2.83279	2.68316
													3.16129	3.51562	3.22858	2.8242	2.71166
					0.05										0.01
	2.93874	2.93079	1.93166	1.95	2.66752	2.66042	2.30029	2.30449	2.41151	2.41048			3.93384	2.58575	3.57079	3.0792	3.22808
													3.9232	2.61029	3.56127	3.08482	3.22671
					0.05										0.01
	2.19537	2.19175	2.21374	2.2078	2.56565	2.55982	2.30358	2.29617	2.21652	2.18549	2.64978	2.62586	2.93875	2.96334	3.43441	3.08361	2.96706	3.54704
													2.93391	2.95539	3.42661	3.07368	2.92552	3.51501

## Sheet: Y2
No.	Name	5-	PnW(g)			4-	PnL(cm)			8-	GYP			6-	GNP			7-	1000GW			2-	PH			1-	HD			3-	TiLL				9- F%				10- Blast
		R1	R2	R3	Means	R1	R2	R3	Means	R1	R2	R3	Means	R1	R2	R3	Means	R1	R2	R3	Means	R1	R2	R3	Means	R1	R2	R3	Means	R1	R2	R3	Means	R1	R2	R3	Means	R1	R2	R3	Means
1	EPL. 2022- 3	4	4.5	4	4.16667	20.9	21.3	21.8	21.3333	51	52.35	51.45	51.6	160	159	166	161.667	29.9	30.44	31	30.4467	115	110	113	112.667	97	96	95	96	25	25	26	25.3333	90.15	89.94	91.13	90.4067	1	1	1	1
2	EPL. 2022- 4	4	4.11	4.5	4.20333	21.25	21.85	21.3	21.4667	61	60.77	62.65	61.4733	175	188	171	178	29.6	29.7	30	29.7667	101	100	105	102	101	100	100	100.333	31	31	29	30.3333	82.88	80.56	81.88	81.7733	1	1	1	1
3	EPL. 2022- 13	3.2	3.7	3.5	3.46667	22	22.3	23	22.4333	52.5	54.25	52	52.9167	126	121	121	122.667	30	29.7	28.6	29.4333	99	100	95	98	92	93	91	92	21	21	20	20.6667	95.66	95.65	94.72	95.3433	1	1	1	1
4	EPL. 2022- 42	3	3.6	3.58	3.39333	21.75	22	22	21.9167	57	56.56	58.33	57.2967	166	165	161	164	24.3	24.6	24	24.3	115.5	121	118	118.167	99	100	99	99.3333	23	22	22	22.3333	85	84.25	86.88	85.3767	1	1	1	1
5	EPL. 2022- 43	4	4.1	4.4	4.16667	25.5	24.2	25.2	24.9667	62	60	65.88	62.6267	218	193	211	207.333	21.34	21.5	22.4	21.7467	118	121	120	119.667	100	100	99	99.6667	28	25	27	26.6667	87	91.34	88	88.78	1	1	1	1
6	EPL. 2022- 49	4.1	4.5	4.9	4.5	22.2	20.6	20.4	21.0667	46.11	47.38	49	47.4967	191	200	203	198	24.54	24.13	24.6	24.4233	90	90	89	89.6667	94	96	93	94.3333	22	19	27	22.6667	96	96.17	94.41	95.5267	1	1	1	1
7	EPL. 2022- 52	5.1	5	5.25	5.11667	22.4	22	21.9	22.1	62	65	65.75	64.25	256	251	271	259.333	25.2	25	26.2	25.4667	106	105	110	107	102	100	99	100.333	25	30	25	26.6667	94	97.8	94.78	95.5267	1	1	1	1
8	EPL. 2022- 53	5.28	4.93	5	5.07	22.4	22.1	21.8	22.1	63.07	59.11	60.34	60.84	179	171	180	176.667	27.7	28.7	28.2	28.2	110	110	107.5	109.167	99	100	101	100	35	24	30	29.6667	90.75	93	90.58	91.4433	1	1	1	1
9	EPL. 2022- 17	4.5	4.7	4.85	4.68333	21	22.4	22	21.8	52.71	54	51.47	52.7267	180	209	190	193	25	23.4	24.3	24.2333	102	98	102	100.667	94	95	95	94.6667	25	20	19	21.3333	90	91	85.57	88.8567	1	1	1	1
10	EPL. 2022- 21	4.34	4	4.22	4.18667	23.1	23	23.3	23.1333	56.31	55.79	55.9	56	161	167	166	164.667	23.93	23.73	24	23.8867	101	105	108	104.667	100	99	100	99.6667	19	18	16	17.6667	87.88	84.76	86.11	86.25	1	1	1	1
11	EPL. 2022- 31	4.65	4.55	4	4.4	24.6	25	24.4	24.6667	53.89	52.44	55.8	54.0433	153	151	160	154.667	30.8	31	31	30.9333	105	104	104	104.333	93	95	94	94	25	22	27	24.6667	97	95.42	95	95.8067	1	1	1	1
12	EPL. 2022- 59	5	4.6	5.48	5.02667	23	24	23.5	23.5	70.23	68.2	65.13	67.8533	151	158	159	156	29.03	29	29.24	29.09	121	125	116	120.667	97	99	97	97.6667	21	26	26	24.3333	94.88	94.48	94.94	94.7667	1	1	1	1
13	EPL. 2022- 61	4.85	4.5	5.4	4.91667	22	23.2	24	23.0667	50.33	49.37	55.12	51.6067	205	194	217	205.333	26	25	25	25.3333	109	117	114	113.333	95	96	97	96	19	20	18	19	95.9	96.31	93.54	95.25	1	1	1	1
14	EPL. 2022- 62	4.5	4.37	4.5	4.45667	23.75	22.4	22.8	22.9833	61.76	55	60.46	59.0733	162	158	165	161.667	25.26	25	27	25.7533	121	124	123	122.667	98	96	100	98	30	31	32	31	95	97.5	94.03	95.51	1	1	1	1
15	EPL. 2022- 64	5.2	5.55	4.5	5.08333	22.9	23.25	22.6	22.9167	61.24	56.38	60.32	59.3133	184	200	189	191	30.1	30.3	32	30.8	105	109	105	106.333	99	100	100	99.6667	26	26	24	25.3333	92	92.3	94	92.7667	1	1	1	1
16	EPL. 2022- 65	4.42	4.4	4.48	4.43333	22	21.6	22	21.8667	63.97	60	60.8	61.59	177	167	170	171.333	28.95	29.24	30	29.3967	93	95	97	95	97	96	97	96.6667	22	23	23	22.6667	93	93.29	93.33	93.2067	1	1	1	1
17	EPL. 2022- 67	5.41	5.49	5.58	5.49333	21.8	22.75	23	22.5167	61.11	65.35	67.66	64.7067	174	187	180	180.333	26.86	26.02	26.8	26.56	124	122	123	123	101	103	102	102	33	28	34	31.6667	90	91.16	89.1	90.0867	1	1	1	1
18	EPL. 2022- 68	5.36	4.56	5.5	5.14	21.55	23.4	23	22.65	65	71.12	68	68.04	161	168	169	166	25.3	26.6	26.6	26.1667	105	100	104	103	102	101	102	101.667	30	25	27	27.3333	86	85	84.9	85.3	1	1	1	1
19	EPL. 2022- 73	4.6	4.86	5	4.82	21.6	21.2	22	21.6	60	60.91	60.31	60.4067	191	179	185	185	26.91	28.75	27	27.5533	104	106	101	103.667	98	99	97	98	28	27	30	28.3333	93	92	91.62	92.2067	1	1	1	1
20	EPL. 2022- 74	4.7	5	4.9	4.86667	21.4	21.75	20	21.05	68	68.33	70	68.7767	178	151	176	168.333	24.75	25.08	25.6	25.1433	115	114	115	114.667	101	101	100	100.667	21	25	26	24	94	92.18	94.68	93.62	1	1	1	1
21	Sakha 104(Parent)	3.86	3.9	4	3.92	21	21.5	20.5	21	45.41	44	45.76	45.0567	133	137	131	133.667	28.2	28.4	29	28.5333	119	117	118	118	104	106	105	105	18	20	15	17.6667	95	95	94.5	94.8333	4	4	5	4.33333

## Sheet: modi anova y1, y2
HD	df	Year	HD	PH	PNW	GNP	GYP	H R	Amylose	GT	Elongation		GYP 2021	df	Meansqr	F	p
Genotypes	20	2021	25.7873	296.263	0.570821	2639.37	372.377						Rows	20	271.061	64.655	2.7e-24
		2022	29.1302	268.058	0.653188	2436.62	317.139	168.615	14.5013	7.20956	300.473		Cols	2	8.57957	2.04645	0.1425
Rep.	2	2021	3.44444	4.11111	0.0986619	66.4762	8.62345						Error	40	4.19242
		2022	1.01587	2.55159	0.0567921	64.5873	4.53035	0.436049	4.91068	0.238254	0.504802		Total	62
Error	40	2021	1.86111	9.62778	0.0780986	103.026	4.68786						GYP 2022	df	Meansqr	F	p
		2022	0.999206	5.95575	0.0798787	61.0873	3.60959	2.02925	0.825866	0.224884	1.61755		Rows	20	276.919	60.1285	1.081e-23
													Cols	2	9.76088	2.11942	0.1334
													Error	40	4.60545
						PNW 2021	Sumsqrs	df	Meansqr	F	p		Total	62
						Rows	18.6336	20	0.931678	11.3461	8.19e-11
						Cols	0.317489	2	0.158744	1.93321	0.158
						Error	3.28458	40	0.0821144
		means	2021	2022		Total	22.2356	62
		pnw	4.63778	4.5481		PNW 2022	Sumsqrs	df	Meansqr	F	p			pnw	gyp
		gyp	45.9633	45.0567		Rows	14.7526	20	0.737628	10.5837	2.425e-10			0.283333	88.9693
						Cols	0.0957556	2	0.0478778	0.686967	0.5089			0.222667	90.7717
						Error	2.78778	40	0.0696944					0.365333	93.1613
						Total	17.6361	62						0.292667	95.3767
														0.532291	9.43236
														0.471876	9.52742
														11.4718	15.3621
														10.3709	15.6162
														0.604428	9.65201
														0.540987	9.7661
														13.0265	15.7199
														11.8898	16.0074
														0.775547	0.955003
														0.76082	0.951718
														58.3667	18327.7
														45.8693	18699
														1257.9	29849.6
				gv	pv	cgv	cpv	h2b	GA	GA%				1008.12	30649
		pnw	2021	0.283333	0.365333	11.4718	13.0265	0.775547	0.583667	12.579
			2022	0.222667	0.292667	10.3709	11.8898	0.76082	0.458693	10.0812
		gyp	2021	88.9693	93.1613	15.3621	15.7199	0.955003	183.277	298.496
			2022	90.7717	95.3767	15.6162	16.0074	0.951718	186.99	306.49
												0.583667	183.277
												0.458693	186.99
												12.579	298.496
												10.0812	306.49
