# Supplementary material for: Improving the cultivated rice Sakha104 (Oryza sativa L.) using gene pools of some relative wild species
Source: PeerJ. 2025 May 23;13:e19453. doi: 10.7717/peerj.19453 (PMC12105619; doi:10.7717/peerj.19453)
Supplement: Supplemental Information 2 [file peerj-13-19453-s002.xlsx]

## Sheet: Means and Sd
	Sakha 104	Min. Line	Max. Line	Lines Av.
HD	105.67	92	103.32	99.2		0.58	1	1.19	0.7
PH	117.8	89.72	124.39	108.89		1.26	0.25	1.27	0.96
Till	17.67	17.44	32.33	25.2		2.52	0.51	0.58	0.43
GY/P	45.96	47.33	68.58	58.88		0.59	0.29	0.52	0.83
Hull%	81.75	75.58	83.15	81.07		0.25	0.79	1.03	0.29
Mill%	71.94	66.58	74	72.28		0.56	1.08	1	0.21
HR	60.28	40.47	69.89	57.07		3.18	0.5	0.84	1.47
Blast score	4.16	1.11	1.1	1.22		0.29	0.19	0.19	0.39

## Sheet: Sheet2
												Sk 104
										1	2	3	Mean	Sd
									HD	105	106	106	105.667	0.57735
									PH	119	116.5	118	117.833	1.25831
									Till	18	20	15	17.6667	2.51661
									GY/P	46.63	45.5	45.76	45.9633	0.591805
									Hull%	82	81.75	81.5	81.75	0.25
									Mill%	72.46	72	71.35	71.9367	0.557704
									HR	60.5	57	63.35	60.2833	3.18054
									Blast score	4	4	4.5	4.16667	0.288675
												Max Line	#DIV/0!	#DIV/0!
									HD	102	104.3	103.67	103.323	1.18854
									PH	123	125.5	124.67	124.39	1.2733
									Till	33	32	32	32.3333	0.57735
									GY/P	68	69	68.73	68.5767	0.517333
									Hull%	82	84	83.46	83.1533	1.03467
									Mill%	73	75	74.01	74.0033	1.00002
									HR	70.67	69	70	69.89	0.840417
									Blast score	1	1	1.33	1.11	0.190526
												Lines Av.	#DIV/0!	#DIV/0!
									HD	100	98.9	98.7	99.2	0.7
									PH	109.75	107.85	109.05	108.883	0.960902
									Till	25.15	24.8	25.66	25.2033	0.432474
									GY/P	58.66	58.18	59.79	58.8767	0.826579
									Hull%	80.96	80.84	81.4	81.0667	0.294845
									Mill%	72.45	72.05	72.33	72.2767	0.205264
									HR	57.16	55.56	58.49	57.07	1.46707
									Blast score	1.67	1	1	1.22333	0.386825
												Min. Line	#DIV/0!	#DIV/0!
									HD	91	93	92	92	1
									PH	90	89.5	89.67	89.7233	0.254231
									Till	17	18	17.33	17.4433	0.509542
									GY/P	47	47.5	47.5	47.3333	0.288675
									Hull%	76	74.66	76.07	75.5767	0.794628
									Mill%	67.2	65.33	67.2	66.5767	1.07965
									HR	40	41	40.42	40.4733	0.502129
									Blast score	1	1.33	1	1.11	0.190526
