# Supplementary material for: Improving the cultivated rice Sakha104 (Oryza sativa L.) using gene pools of some relative wild species
Source: PeerJ. 2025 May 23;13:e19453. doi: 10.7717/peerj.19453 (PMC12105619; doi:10.7717/peerj.19453)
Supplement: Supplemental Information 3 [file peerj-13-19453-s003.xlsx]

## Sheet: year 1
	hulling %			X	milling %			X	head rice %			X	Amylose %			X	GT			X	Elongation			X
1	80	81.25	80.47	80.5733	70	73	72.35	71.7833	50	50	51.3	50.4333	29.6479	29.35	28	28.9993	4	4	4	4	36.7857	40.2846	37.7358	38.2687
2	76.6667	75	77	76.2222	66.6667	68.35	66.58	67.1989	56.6667	55	57.24	56.3022	19.0141	18.55	20.15	19.238	5	6	6	5.66667	47.1698	43.6364	49.323	46.7097
3	80	81	81	80.6667	73.3333	70	72.8	72.0444	60	61	60.35	60.45	23.7324	22.35	22	22.6941	2	2	3	2.33333	21.0526	24.486	25.8123	23.7836
4	80	81.25	81.47	80.9067	70	70	69	69.6667	40	42	44	42	24.5775	24	24.35	24.3092	2	2	2	2	26.92	30.1887	27.2059	28.1049
5	83.3333	82.25	82.65	82.7444	70	71.4	70.25	70.55	40	40	41.25	40.4167		25.35	26.01	17.12	3	2	3	2.66667	17.841	20.3636	19.29	19.1649
6	83.3333	82	82.88	82.7378	73.3333	74.35	73	73.5611	56.6667	55.35	55	55.6722	20.9155	19.94	20.35	20.4018	4	3	4	3.66667	34.7403	28.7879	29.375	30.9677
7	80	79.45	80.24	79.8967	73.3333	73.45	73.89	73.5578	50	51.25	50.89	50.7133	25.9155	26.03	26.02	25.9885	6	6	7	6.33333	30.45	28.4315	29.8246	29.5687
8	80	80.4	79.45	79.95	73.3333	72.48	74.25	73.3544	50	50.25	51.32	50.5233	22.3944	21.09	21.32	21.6015	7	7	7	7	47.7778	45.6954	48.0952	47.1895
9	80	80	81.45	80.4833	70	71.55	70.44	70.6633	40	41.78	42.23	41.3367	27.3944	28.25	26.35	27.3315	6	6	5	5.66667	19.11	18.7845	16.1404	18.0116
10	80	80	81.57	80.5233	73.3333	74	72.89	73.4078	50	49.26	50	49.7533	24.6479	23.5	23.04	23.7293	6	6	6	6	14.7	18.77	16.4407	16.6369
11	83.3333	82	83.45	82.9278	73.3333	73.24	75.45	74.0078	70	71.55	68.44	69.9967	22.1831	22.35	22.35	22.2944	6	6	6	6	50.1908	49.4382	46.73	48.7863
12	83.3333	82.24	83.44	83.0044	70	70	70	70	60	61.54	58.47	60.0033	22.5352	22	22	22.1784	6	6	6	6	40.3571	39.44	35.8491	38.5487
13	80	81.25	80.55	80.6	70	70	72	70.6667	53.3333	51.45	52.34	52.3744	21.9718	22.35	22	22.1073	2	3	3	2.66667	24	25.32	23.6364	24.3188
14	80	80	80	80	70	71	69.55	70.1833	50	51.78	52.14	51.3067	21.1268	21.25	21.55	21.3089	4	5	5	4.66667	20.5202	22.79	21.3043	21.5382
15	83.3333	82	82.33	82.5544	73.3333	72	73.2	72.8444	63.3333	60.95	62.35	62.2111	21.2676	22	21.56	21.6092	7	7	7	7	44.2164	35.46	37.037	38.9045
16	80	80	80	80	73.3333	73.55	72.95	73.2778	63.3333	62.87	64.21	63.4711	24.2254	23.56	22.369	23.3848	4	5	5	4.66667	44	43.4034	44.3137	43.9057
17	80	80	79.54	79.8467	70	71.45	69.79	70.4133	50	51.25	50.25	50.5	24.6479	24.35	24.05	24.3493	7	6	6	6.33333	37.037	34.3693	35.4717	35.626
18	83.3333	84.26	82.78	83.4578	73.3333	74.25	71.25	72.9444	63.3333	65	64	64.1111	23.2394	23.15	23.02	23.1365	8	8	7	7.66667	20.18	23.8779	21.8182	21.9587
19	80	79.88	81	80.2933	70	71.25	69.58	70.2767	56.6667	55	55.89	55.8522	25.2817	25.87	26.35	25.8339	2	3	2	2.33333	20.298	17.8	16.9811	18.3597
20	80	80	81.55	80.5167	73.3333	72.35	74	73.2278	56.6667	55.396	57.25	56.4376	23.5915	24.35	22.35	23.4305	7	7	6	6.66667	18.1818	17.8992	21.1765	19.0858
21	82	81.75	81.5	81.75	72.46	72	71.35	71.9367	60.5	57	63.35	60.2833	18	17.5	18	17.8333	6.1	5.8	6	5.96667	43	41	44	42.6667
	80.8889	80.761	81.1581	80.936	71.5457	71.889	71.6462	71.6937	54.3095	54.2703	54.87	54.4833	23.3155	23.1971	23.009	22.8038	4.95714	5.0381	5.04762	5.01429	31.3585	30.9632	30.8362	31.0526
	80.963	80.837	81.4027	81.0675	72.4463	72.0797	72.3321	72.286	57.1587	55.5554	58.49	57.0681

## Sheet: out puts
H% 1	Sumsqrs	df	Meansqr	F	p	Mill % 1	Sumsqrs	df	Meansqr	F	p	H. R % 1	Sumsqrs	df	Meansqr	F	p
Rows	158.58	20	7.92899	19.4632	1.058e-14	Rows	187.333	20	9.36665	10.2667	3.876e-10	Rows	3581.27	20	179.063	172.026	1.465e-32
Rows	153.434	20	7.67172	9.76716	8.298e-10	Rows	177.539	20	8.87696	42.3532	8.152e-21	Rows	3422	20	171.1	338.339	2.297e-38
Cols	1.72751	2	0.863757	2.12025	0.1333	Cols	1.31757	2	0.658787	0.722094	0.492	Cols	2.13978	2	1.06989	1.02784	0.367
Cols	2.20784	2	1.10392	1.40544	0.2571	Cols	0.243375	2	0.121687	0.580586	0.5642	Cols	8.48035	2	4.24018	8.38466	0.0009098
Error	16.2954	40	0.407384			Error	36.4932	40	0.912329			Error	41.6363	40	1.04091
Error	31.4184	40	0.785461			Error	8.38376	40	0.209594			Error	20.2282	40	0.505706
Total	176.603	62				Total	225.144	62				Total	3625.04	62
Amy. 1	Sumsqrs	df	Meansqr	F	p	GT 1	Sumsqrs	df	Meansqr	F	p	Elong. 1	Sumsqrs	df	Meansqr	F	p
Rows	415.124	20	20.7562	62.2806	5.522e-24	Rows	192.095	20	9.60476	41.5876	1.147e-20	Rows	6828.18	20	341.409	77.9162	7.487e-26
Rows	389.2	20	19.46	81.6286	3.049e-26	Rows	144.898	20	7.24488	26.8365	3.593e-17	Rows	5695.36	20	284.768	233.612	3.512e-35
Cols	1.74389	2	0.871944	2.61633	0.08554	Cols	0.0952381	2	0.047619	0.206186	0.8145	Cols	4.15544	2	2.07772	0.474176	0.6259
Cols	4.64873	2	2.32436	9.74998	0.0003555	Cols	0.506667	2	0.253333	0.938399	0.3997	Cols	3.61913	2	1.80956	1.48449	0.2388
Error	13.3308	40	0.333269			Error	9.2381	40	0.230952			Error	175.27	40	4.38175
Error	9.53587	40	0.238397			Error	10.7985	40	0.269963			Error	48.7592	40	1.21898
Total	430.199	62				Total	201.429	62				Total	7007.6	62
H 2	Sumsqrs	df	Meansqr	F	p	M.2	Sumsqrs	df	Meansqr	F	p	H. R. 2	Sumsqrs	df	Meansqr	F	p
Rows	153.434	20	7.67172	9.76716	8.298e-10	Rows	177.539	20	8.87696	42.3532	8.152e-21	Rows	3422	20	171.1	338.339	2.297e-38
Cols	2.20784	2	1.10392	1.40544	0.2571	Cols	0.243375	2	0.121687	0.580586	0.5642	Cols	8.48035	2	4.24018	8.38466	0.0009098
Error	31.4184	40	0.785461			Error	8.38376	40	0.209594			Error	20.2282	40	0.505706
Total	187.061	62				Total	186.166	62				Total	3450.71	62
Amy. 2	Sumsqrs	df	Meansqr	F	p	GT 2	Sumsqrs	df	Meansqr	F	p	Elong 2	Sumsqrs	df	Meansqr	F	p
Rows	389.2	20	19.46	81.6286	3.049e-26	Rows	144.898	20	7.24488	26.8365	3.593e-17	Rows	5695.36	20	284.768	233.612	3.512e-35
Cols	4.64873	2	2.32436	9.74998	0.0003555	Cols	0.506667	2	0.253333	0.938399	0.3997	Cols	3.61913	2	1.80956	1.48449	0.2388
Error	9.53587	40	0.238397			Error	10.7985	40	0.269963			Error	48.7592	40	1.21898
Total	403.385	62				Total	156.203	62				Total	5747.74	62
				second year
Amy modi	Sumsqrs	df	Meansqr	F	p	gt modi	Sumsqrs	df	Meansqr	F	p	hr modi	Sumsqrs	df	Meansqr	elong modi	Sumsqrs	df	Meansqr
Rows	290.027	20	14.5013	17.5589	6.227e-14	Rows	144.191	20	7.20956	32.059	1.418e-18	Rows	3372.29	20	168.615	Rows	6009.47	20	300.473
Cols	9.82136	2	4.91068	5.94609	0.005485	Cols	0.476508	2	0.238254	1.05945	0.3562	Cols	0.872098	2	0.436049	Cols	1.0096	2	0.504802
Error	33.0346	40	0.825866			Error	8.99536	40	0.224884			Error	81.1698	40	2.02925	Error	64.7021	40	1.61755

## Sheet: year 2
		Hull. %				Mill. %				H.R. %				Amillo.			GT					Elongation
	R1	R2	R3	Mean	R1	R2	R3	Mean	R1	R2	R3	Mean	R1	R2	R3	Mean	R1	R2	R3	Mean	R1	R2	R3	Mean
1	80.5733	79	80	79.8578	71.7833	70.66	70.5	70.9811	50.4333	51	52	51.1444	27.34	25.7	27.6	26.88	4	3.69	4	3.89667	38.2687	38	37	37.7562	37
2	76.2222	75	77	76.0741	67.1989	68	67.39	67.5296	56.3022	56.5	57	56.6007	19.238	18.24	18	18.4927	5.66667	5	5.66667	5.44444	46.7097	45	44	45.2366	44
3	80.6667	78	80.67	79.7789	72.0444	71	71.38	71.4748	60.45	60	63	61.15	22.6941	22.6941	21	22.1294	2.33333	3.66	2.33333	2.77556	23.7836	24	24	23.9279	24
4	80.9067	80	80.24	80.3822	69.6667	70	69.65	69.7722	42	43	43	42.6667	24.3092	24.3092	23	23.8728	2	3	2	2.33333	28.1049	27	27	27.3683	27
5	82.7444	83	82.65	82.7981	70.55	70	71	70.5167	40.4167	41	42	41.1389	24.22	23	23	23.4067	2.66667	2.7	2.66667	2.67778	19.1649	20	20	19.7216	20
6	82.7378	82	81.88	82.2059	73.5611	74	73.23	73.597	55.6722	55	57	55.8907	20.4018	20.4018	18	19.6012	3.66667	3.9	3.66667	3.74444	30.9677	30	30	30.3226	30
7	79.8967	80	78.55	79.4822	73.5578	73	73.25	73.2693	50.7133	50.5	52	51.0711	25.9885	22.33	24.88	24.3995	6.33333	5.5	6.33333	6.05556	29.5687	30	29	29.5229	29
8	79.95	81.05	78.33	79.7767	73.3544	73	74	73.4515	50.5233	50.8	51	50.7744	21.6015	20	20	20.5338	7	6	7	6.66667	47.1895	45	45	45.7298	45
9	80.4833	79	80	79.8278	70.6633	71	70.22	70.6278	41.3367	42	41	41.4456	24	27.3315	26.66	25.9972	5.66667	5	5.66667	5.44444	18.0116	20	18	18.6705	18
10	80.5233	81.2	80.34	80.6878	73.4078	74	73.68	73.6959	49.7533	50	52	50.5844	23.7293	23.7293	22	23.1529	6	5	6	5.66667	16.6369	18	20	18.2123	20
11	82.9278	83.33	82.68	82.9793	74.0078	74	73.87	73.9593	69.9967	69	70	69.6656	22.2944	22.2944	21	21.8629	6	5.5	6	5.83333	48.7863	45	46	46.5954	46
12	83.0044	81	83.33	82.4448	70	70	70	70	60.0033	59	58.88	59.2944	22.1784	22.1784	21.6	21.9856	6	5.5	6	5.83333	38.5487	37	38	37.8496	38
13	80.6	81	80	80.5333	70.6667	70	71	70.5556	52.3744	53	55	53.4581	22.1073	22.1073	21	21.7382	2.66667	3	2.66667	2.77778	24.3188	26	24	24.7729	24
14	80	78	81	79.6667	70.1833	70	71.31	70.4978	51.3067	52	53	52.1022	21.3089	21.3089	20	20.8726	4.66667	5	4.66667	4.77778	21.5382	24	22	22.5127	22
15	82.5544	83.1	80	81.8848	72.8444	72	73	72.6148	62.2111	63.33	63	62.847	21.6092	21.6092	22	21.7395	7	6.3	7	6.76667	38.9045	38	39	38.6348	39
16	80	80	80.06	80.02	73.2778	73	73.33	73.2026	63.4711	63.66	63	63.377	23.3848	23.3848	22.56	23.1099	4.66667	5	4.66667	4.77778	43.9057	43	41	42.6352	41
17	79.8467	78.87	79	79.2389	70.4133	70	71.1	70.5044	50.5	51	50	50.5	24.3493	24.3493	22.68	23.7929	6.33333	6	6.33333	6.22222	35.626	35	34	34.8753	34
18	83.4578	82	83	82.8193	72.9444	73	72.76	72.9015	64.1111	64.8	63.76	64.2237	23.1365	21	22.8	22.3122	7.66667	7	7.66667	7.44444	21.9587	22	22	21.9862	22
19	80.2933	82	81	81.0978	70.2767	71	70.66	70.6456	55.8522	55	55.1	55.3174	25.8339	23	24.6	24.478	2.33333	4	2.33333	2.88889	18.3597	21	20	19.7866	20
20	80.5167	81	80.5	80.6722	73.2278	74	73.5	73.5759	56.4376	57	58	57.1459	23.4305	22	22.6	22.6768	6.66667	5	6.66667	6.11111	19.0858	22	20	20.3619	20
21	81	81	82	81.3333	70	71.5	71.3	70.9333	61	59	51	57	19	18	17.2	18.0667	5.5	5.5	6	5.66667	41	38	44	41	44
	80.9003	80.4548	80.5824	80.6458	71.6014	71.579	71.7205	71.6337	54.5174	54.5995	54.7971	54.638	22.9598	22.3318	22.0086	22.4334	4.99206	4.82143	5.01587	4.94312	30.9733	30.8571	30.6667	30.8324	30.6667
